# Supplementary material for: The Acute Toxicity of Tetrodotoxin and Tetrodotoxin–Saxitoxin Mixtures to Mice by Various Routes of Administration
Source: PubMed Central journal article supplement (PMC6266834; doi:10.3390/toxins10110423), 2018-10-23
Supplement: toxins-10-00423-s001.pdf [file toxins-10-00423-s001.pdf]

## Supplementary Materials: The Acute Toxicity of Tetrodotoxin and Tetrodotoxin–Saxitoxin Mixtures to Mice by Various Routes of Administration

Sarah C. Finch, Michael J. Boundy and D. Tim Harwood

**Table S1.** Dose and death times for mice dosed tetrodotoxin by intraperitoneal injection.

| Dose (nmol/kg) | Total Number of Mice | Number of Deaths | Death Times (min)                    |
|----------------|----------------------|------------------|--------------------------------------|
| 80             | 5                    | 5                | 5.25, 5.95, 5.33, 4.67, 6.95         |
| 75             | 5                    | 5                | 5.66, 7.33, 6.25, 6.50, 6.06         |
| 70             | 5                    | 5                | 6.82, 7.40, 7.33, 7.50, 7.10         |
| 65             | 6                    | 6                | 12.66, 7.21, 8.92, 7.66, 6.25, 8.00  |
| 60             | 6                    | 6                | 11.67, 8.50, 9.92, 10.50, 7.55, 8.20 |
| 55             | 7                    | 6                | 10.25, 9.83, 8.25, 8.42, 8.88, 8.42  |
| 50             | 5                    | 4                | 8.33, 9.33, 9.88, 14.20              |
| 45             | 6                    | 5                | 10.33, 12.83, 12.58, 13.05, 11.80    |
| 40             | 5                    | 4                | 13.95, 15.48, 13.08, 15.13           |
| 35             | 5                    | 2                | 25.03, 21.40                         |
| 30             | 5                    | 2                | 33.15, 32.15                         |
| 25             | 5                    | 0                | -                                    |

**Table S2.** Mortalities and death times of mice dosed with tetrodotoxin (TTX), saxitoxin (STX) or mixtures of the two toxins by intraperitoneal injection.

| Dose (nmol/kg)       | Total Number of Mice | Number of Deaths | Death Times (min) |
|----------------------|----------------------|------------------|-------------------|
| <b>STX</b>           |                      |                  |                   |
| 22.1                 | 3                    | 0                | -                 |
| 24.8                 | 2                    | 2                | 11.43, 24.45      |
| <b>TTX</b>           |                      |                  |                   |
| 24.8                 | 1                    | 0                | -                 |
| 27.8                 | 2                    | 0                | -                 |
| 31.2                 | 3                    | 2                | 22.10, 45.00      |
| 35.0                 | 1                    | 1                | 19.98             |
| <b>STX/TTX (1:2)</b> |                      |                  |                   |
| 24.8                 | 2                    | 0                | -                 |
| 27.8                 | 3                    | 2                | 21.25, 33.0       |
| 31.2                 | 1                    | 1                | 20.0              |
| <b>STX/TTX (1:1)</b> |                      |                  |                   |
| 22.1                 | 3                    | 0                | -                 |
| 24.8                 | 2                    | 2                | 43.67, 30.21      |
| <b>STX/TTX (2:1)</b> |                      |                  |                   |
| 22.1                 | 1                    | 0                | -                 |
| 24.8                 | 3                    | 1                | 30.0              |
| 27.8                 | 2                    | 2                | 25.9, 15.0        |

**Table S3.** Mortalities and death times of mice dosed with tetrodotoxin (TTX) or saxitoxin (STX) by gavage.

| Dose (nmol/kg) | Total Number of Mice | Number of Deaths | Death times (min) |
|----------------|----------------------|------------------|-------------------|
| <b>STX</b>     |                      |                  |                   |
| 1060           | 3                    | 0                | -                 |
| 1190           | 4                    | 2                | 194, 300          |
| 1340           | 3                    | 2                | 60, 240           |
| 1500           | 1                    | 1                | 95                |
| <b>TTX</b>     |                      |                  |                   |
| 1500           | 1                    | 0                | -                 |
| 1680           | 2                    | 0                | -                 |
| 1890           | 3                    | 2                | 120, 60           |
| 2120           | 1                    | 1                | 90                |

**Table S4.** Mortalities and death times of mice dosed with tetrodotoxin (TTX), saxitoxin (STX) or mixtures of the two toxins by feeding.

| Dose (nmol/kg)       | Total Number of Mice | Number of Deaths | Death Times (min) |
|----------------------|----------------------|------------------|-------------------|
| <b>STX</b>           |                      |                  |                   |
| 2540                 | 1                    | 0                | -                 |
| 2850                 | 5                    | 2                | 90, 360           |
| 3200                 | 2                    | 2                | 98, 190           |
| <b>TTX</b>           |                      |                  |                   |
| 2540                 | 1                    | 0                | -                 |
| 2850                 | 3                    | 1                | 90                |
| 3200                 | 2                    | 2                | 65, 100           |
| <b>STX/TTX (1:2)</b> |                      |                  |                   |
| 2850                 | 2                    | 0                | -                 |
| 3200                 | 3                    | 1                | 74                |
| 3590                 | 3                    | 1                | 109               |
| 4030                 | 2                    | 2                | 90, 120           |
| <b>STX/TTX (1:1)</b> |                      |                  |                   |
| 2540                 | 2                    | 0                | -                 |
| 2850                 | 3                    | 2                | 90, 225           |
| 3200                 | 1                    | 1                | 230               |
| <b>STX/TTX (2:1)</b> |                      |                  |                   |
| 2540                 | 1                    | 0                | -                 |
| 2850                 | 3                    | 1                | 208               |
| 3200                 | 2                    | 2                | 105, 230          |
